# Supplementary material for: A cuproptosis-related long non-coding RNA signature to predict the prognosis and immune microenvironment characterization for lung adenocarcinoma
Source: PubMed Central journal article supplement — Transl Lung Cancer Res. 2022 Oct;11(10):2079–93. doi: 10.21037/tlcr-22-660 (PMC9641048; doi:10.21037/tlcr-22-660), 2022-10
Supplement: tlcr-11-10-2079-supplementary.pdf [file tlcr-11-10-2079-supplementary.pdf]

**Table S1** Cuproptosis-related genes

---

Genes

---

*NFE2L2*

*NLRP3*

*ATP7B*

*ATP7A*

*SLC31A1*

*FDX1*

*LIAS*

*LIPT1*

*LIPT2*

*DLD*

*DLAT*

*PDHA1*

*PDHB*

*MTF1*

*GLS*

*CDKN2A*

*DBT*

*GCSH*

*DLST*

---

**Table S2** Demographic and clinical characteristics between the training and testing cohort

| Characteristics | Total       | Train       | Test        | P-value* |
|-----------------|-------------|-------------|-------------|----------|
| Age, years      |             |             |             | 0.1464   |
| <=65            | 237 (47.4%) | 128 (51.2%) | 109 (43.6%) |          |
| >65             | 253 (50.6%) | 119 (47.6%) | 134 (53.6%) |          |
| unknow          | 10 (2%)     | 3 (1.2%)    | 7 (2.8%)    |          |
| Gender          |             |             |             | 0.2434   |
| Female          | 270 (54%)   | 128 (51.2%) | 142 (56.8%) |          |
| Male            | 230 (46%)   | 122 (48.8%) | 108 (43.2%) |          |
| Stage           |             |             |             | 0.2969   |
| Stage I         | 268 (53.6%) | 124 (49.6%) | 144 (57.6%) |          |
| Stage II        | 119 (23.8%) | 66 (26.4%)  | 53 (21.2%)  |          |
| Stage III       | 80 (16%)    | 43 (17.2%)  | 37 (14.8%)  |          |
| Stage IV        | 25 (5%)     | 11 (4.4%)   | 14 (5.6%)   |          |
| unknow          | 8 (1.6%)    | 6 (2.4%)    | 2 (0.8%)    |          |

\*Chi-square test.

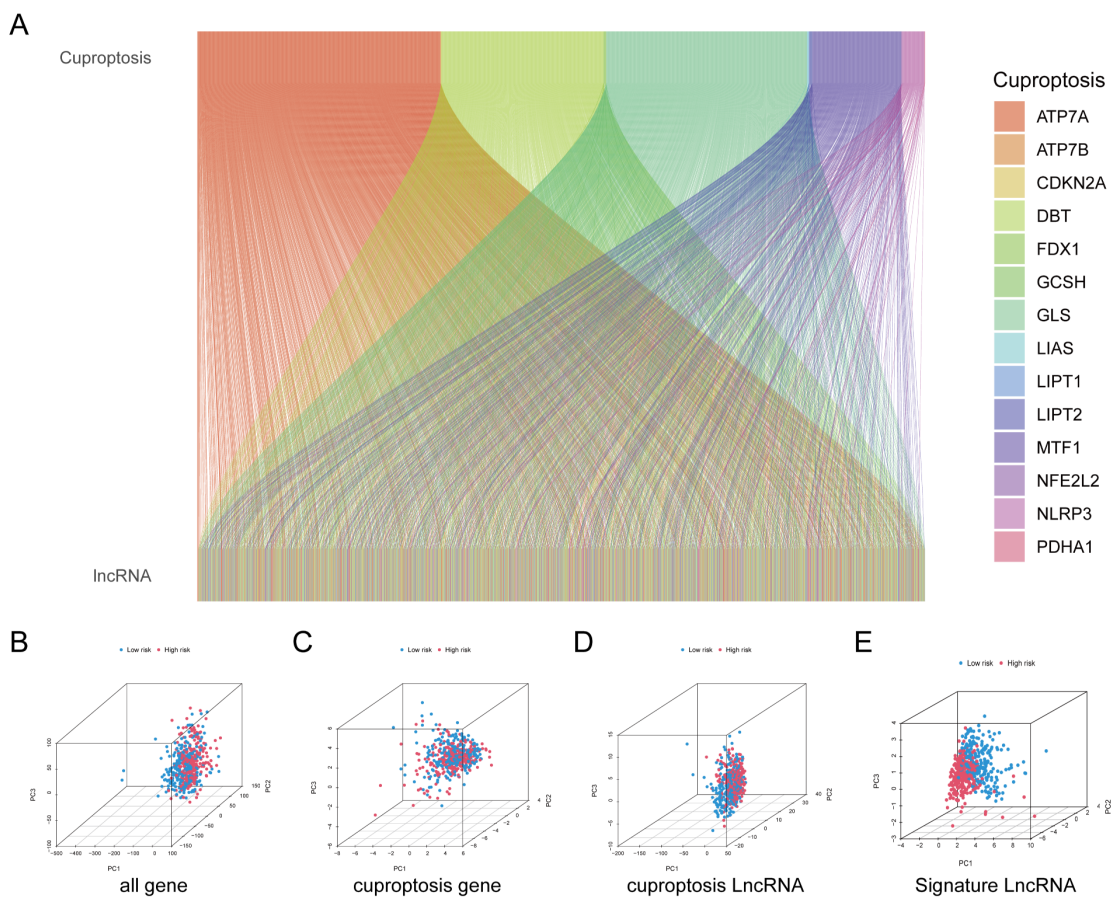

**Figure S1** Identification of cuproptosis-related lncRNAs and principal component analysis (PCA) in the entire LUAD cohort. (A) Sankey diagram for cuproptosis-related genes and lncRNAs. (B-E) PCA analysis based on (B) all gene, (C) cuproptosis-related gene, (D) cuproptosis-related lncRNAs and (E) signature lncRNAs, respectively.

**Table S3** The cuproptosis-related lncRNAs risk signature

| LncRNAs    | coefficient  |
|------------|--------------|
| AC090541.1 | 0.425683724  |
| LINC02390  | -1.102861115 |
| NIFK-AS1   | -0.766522002 |
| AC026355.2 | -0.40311251  |
| AC107021.2 | 1.174579099  |
| MIR34AHG   | -0.944282562 |
| LINC01215  | -0.560092802 |

Table S4 Risk score for patients in the training cohort

Table with 10 columns: Id, AC090541.1, LINC02390, NIFK-AS1, AC026355.2, AC107021.2, MIR34A4HG, LINC01215, Risk score, Risk group\*. Rows list various patient IDs like TCGA-MP-A4T6, TCGA-49-4510, etc., with corresponding values for each feature and a risk group classification.

\* The training cohort patients were divided into high-risk and low-risk groups using the median risk score as the cut-off.



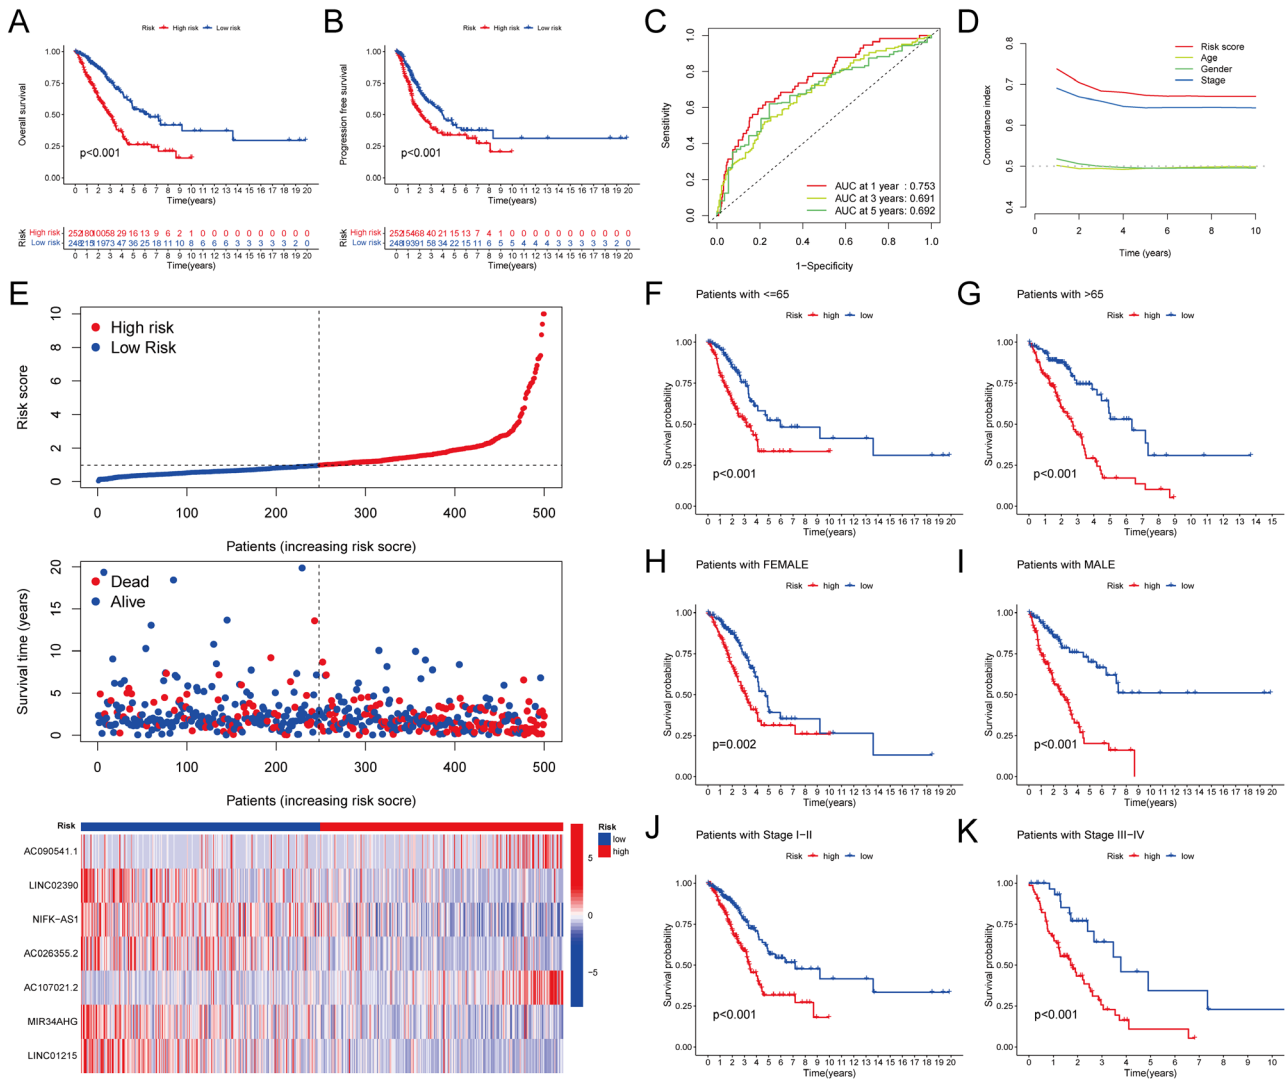

**Figure S2** Survival analysis of the CLPS in the entire LUAD cohort. Kaplan-Meier curves of (A) OS and (B) PFS in the entire cohort. (C) ROC curves for the risk signature at 1, 3, and 5 years in the entire cohort. (D) The C-index of the CLPS risk score and other clinical characteristics in the entire cohort. (E) Survival state (the middle section) of the patients sorted according to the risk scores (the top section) and the differences in the CLPS lncRNAs between the high and low-risk groups (the bottom section) in the entire cohort. (F-K) Kaplan-Meier curves of OS in distinct subgroups with different clinical characteristics: (F) age  $\leq 65$ , (G) age  $> 65$ , (H) female, (I) male, (J) Stage I-II, and (K) Stage III-IV. CLPS, cuproptosis-related lncRNAs prognostic signature; LUAD, lung adenocarcinoma; OS, overall survival; PFS, progression-free survival; ROC, receiver operating characteristic; lncRNAs, long non-coding RNAs; AUC, area under the curve.





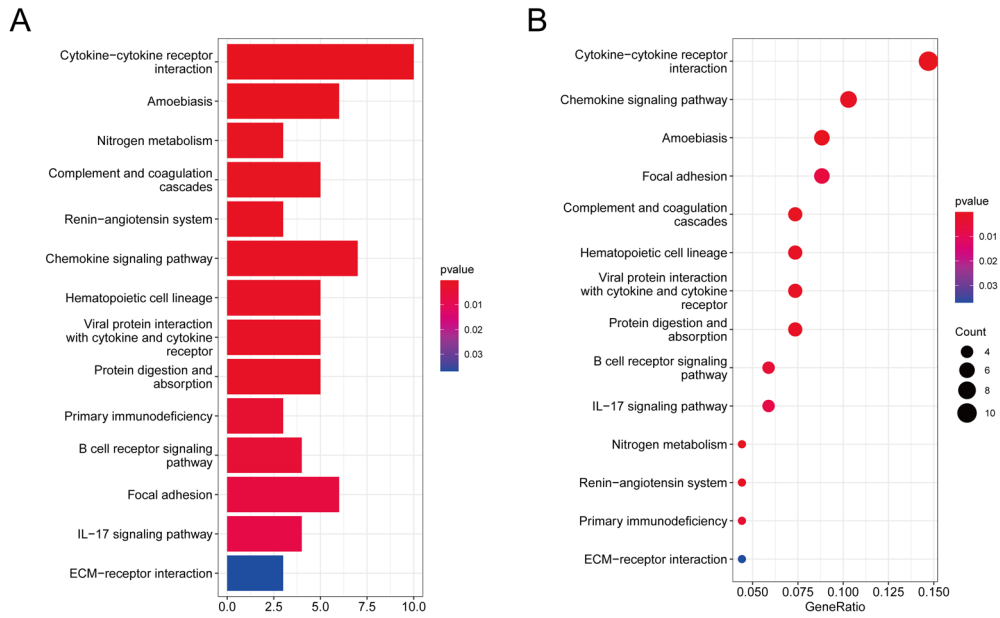

**Figure S3** Functional annotation for DEGS between the high-risk and low-risk groups using KEGG pathway analysis. (A) Bar plot and (B) bubble plot showing the significantly enriched KEGG pathways. Bubble color representing the P value, and the bubble size representing the number of genes in the relevant pathway.

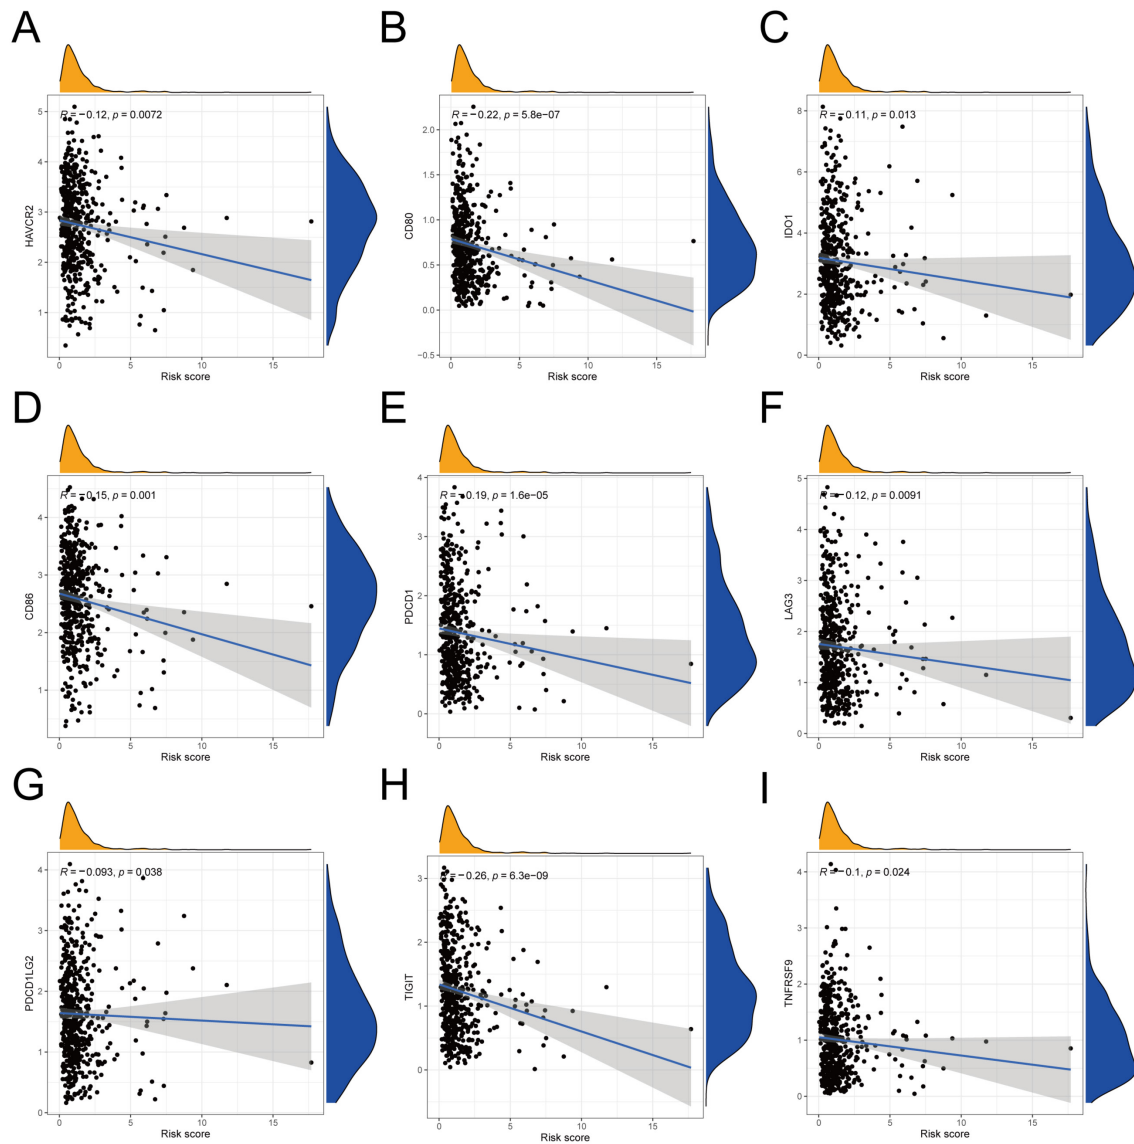

**Figure S4** Correlation between the risk score and immune-checkpoint related gene expression: (A) HAVCR2, (B) CD80, (C) IDO1, (D) CD86, (E) PDCD1, (F) LAG3, (G) PDCD1LG2, (H) TIGIT, (I) TNFRSF9.
